# Supplementary material
Source: Research Square preprint supplement (doi:10.21203/rs.3.rs-9459444/v1)

Imbalance dataset results

Table1: models comparison of all ML models of Imbalance dataset

| Model | Accuracy | Precision | Sensitivity | Specificity | F1-score |
| --- | --- | --- | --- | --- | --- |
| DT | 0.57710.029 | 0.3750.036 | 0.3820.088 | 0.6770.063 | 0.3750.054 |
| RF | 0.6540.008 | 0.2170.004 | 0.0120.016 | 0.9850.007 | 0.0220.031 |
| GBM | 0.643 0.025 | 0.4030.112 | 0.1100.030 | 0.9140.029 | 0.1730.047 |
| XGBM | 0.6220.029 | 0.3850.078 | 0.2000.045 | 0.8370.032 | 0.2620.055 |
| LGBM | 0.6260.030 | 0.3820.093 | 0.1740.045 | 0.8560.034 | 0.2390.059 |
| DNM | 0.5750.054 | 0.5760.055 | 0.5690.056 | 0.5810.051 | 0.5720.054 |


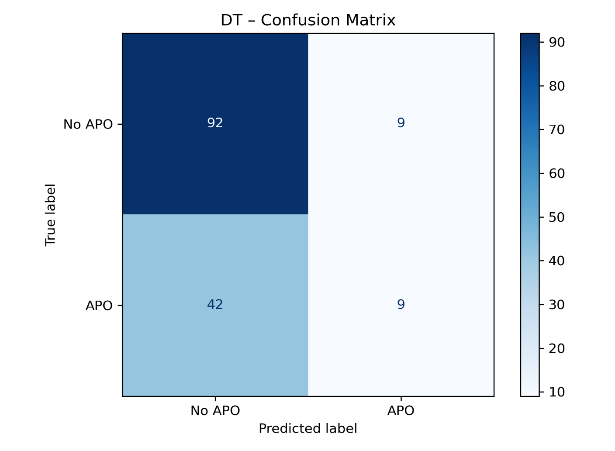

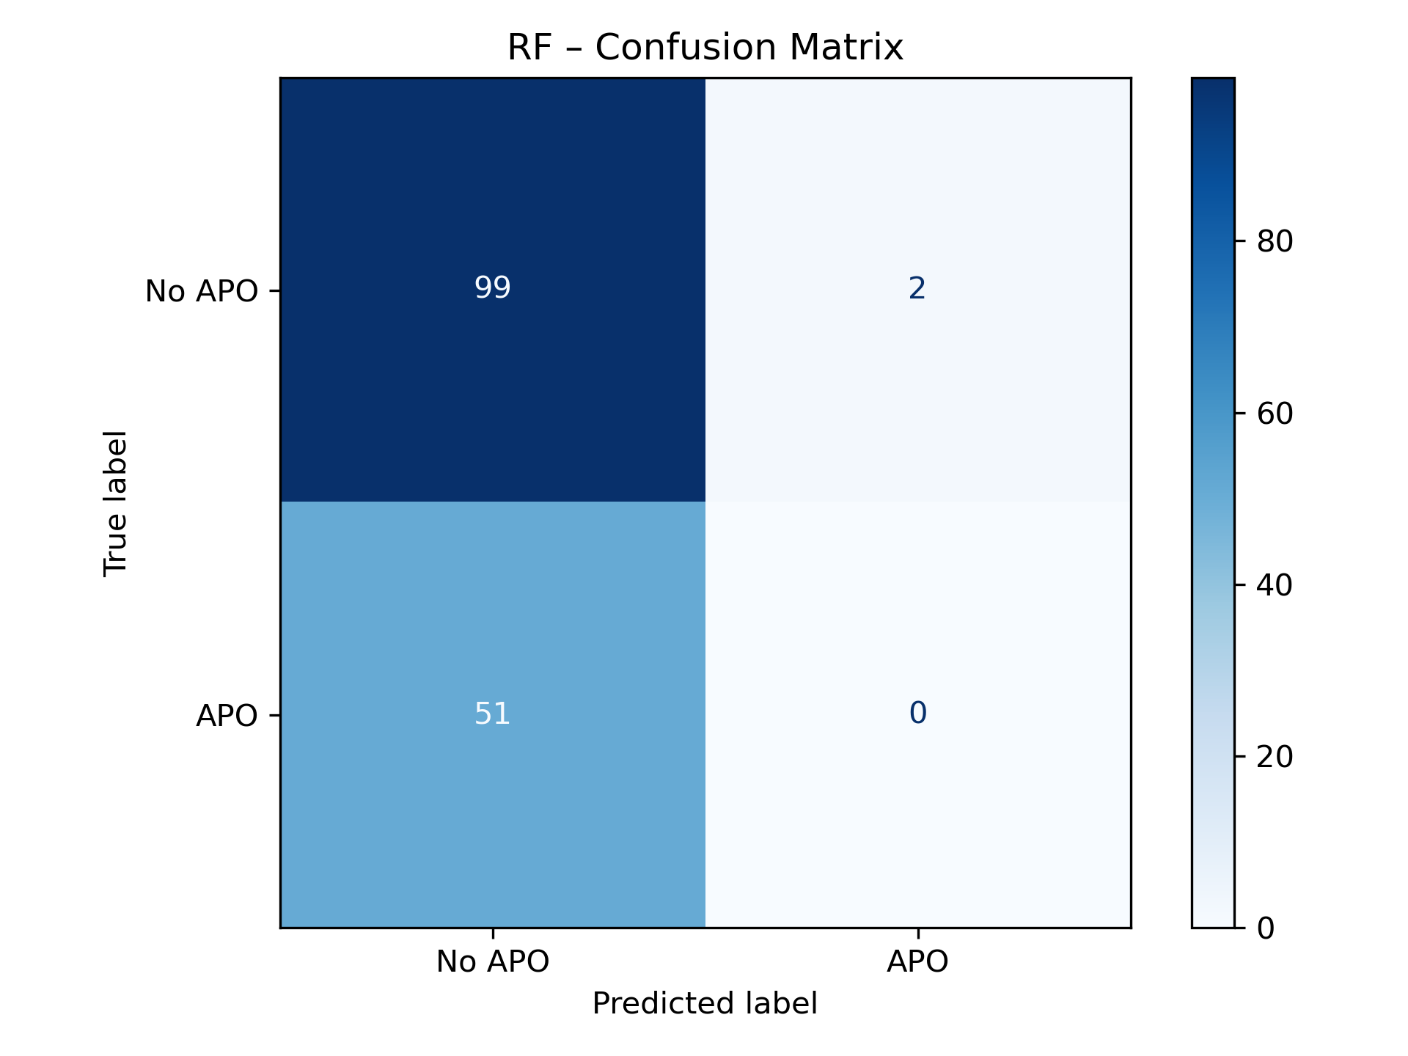

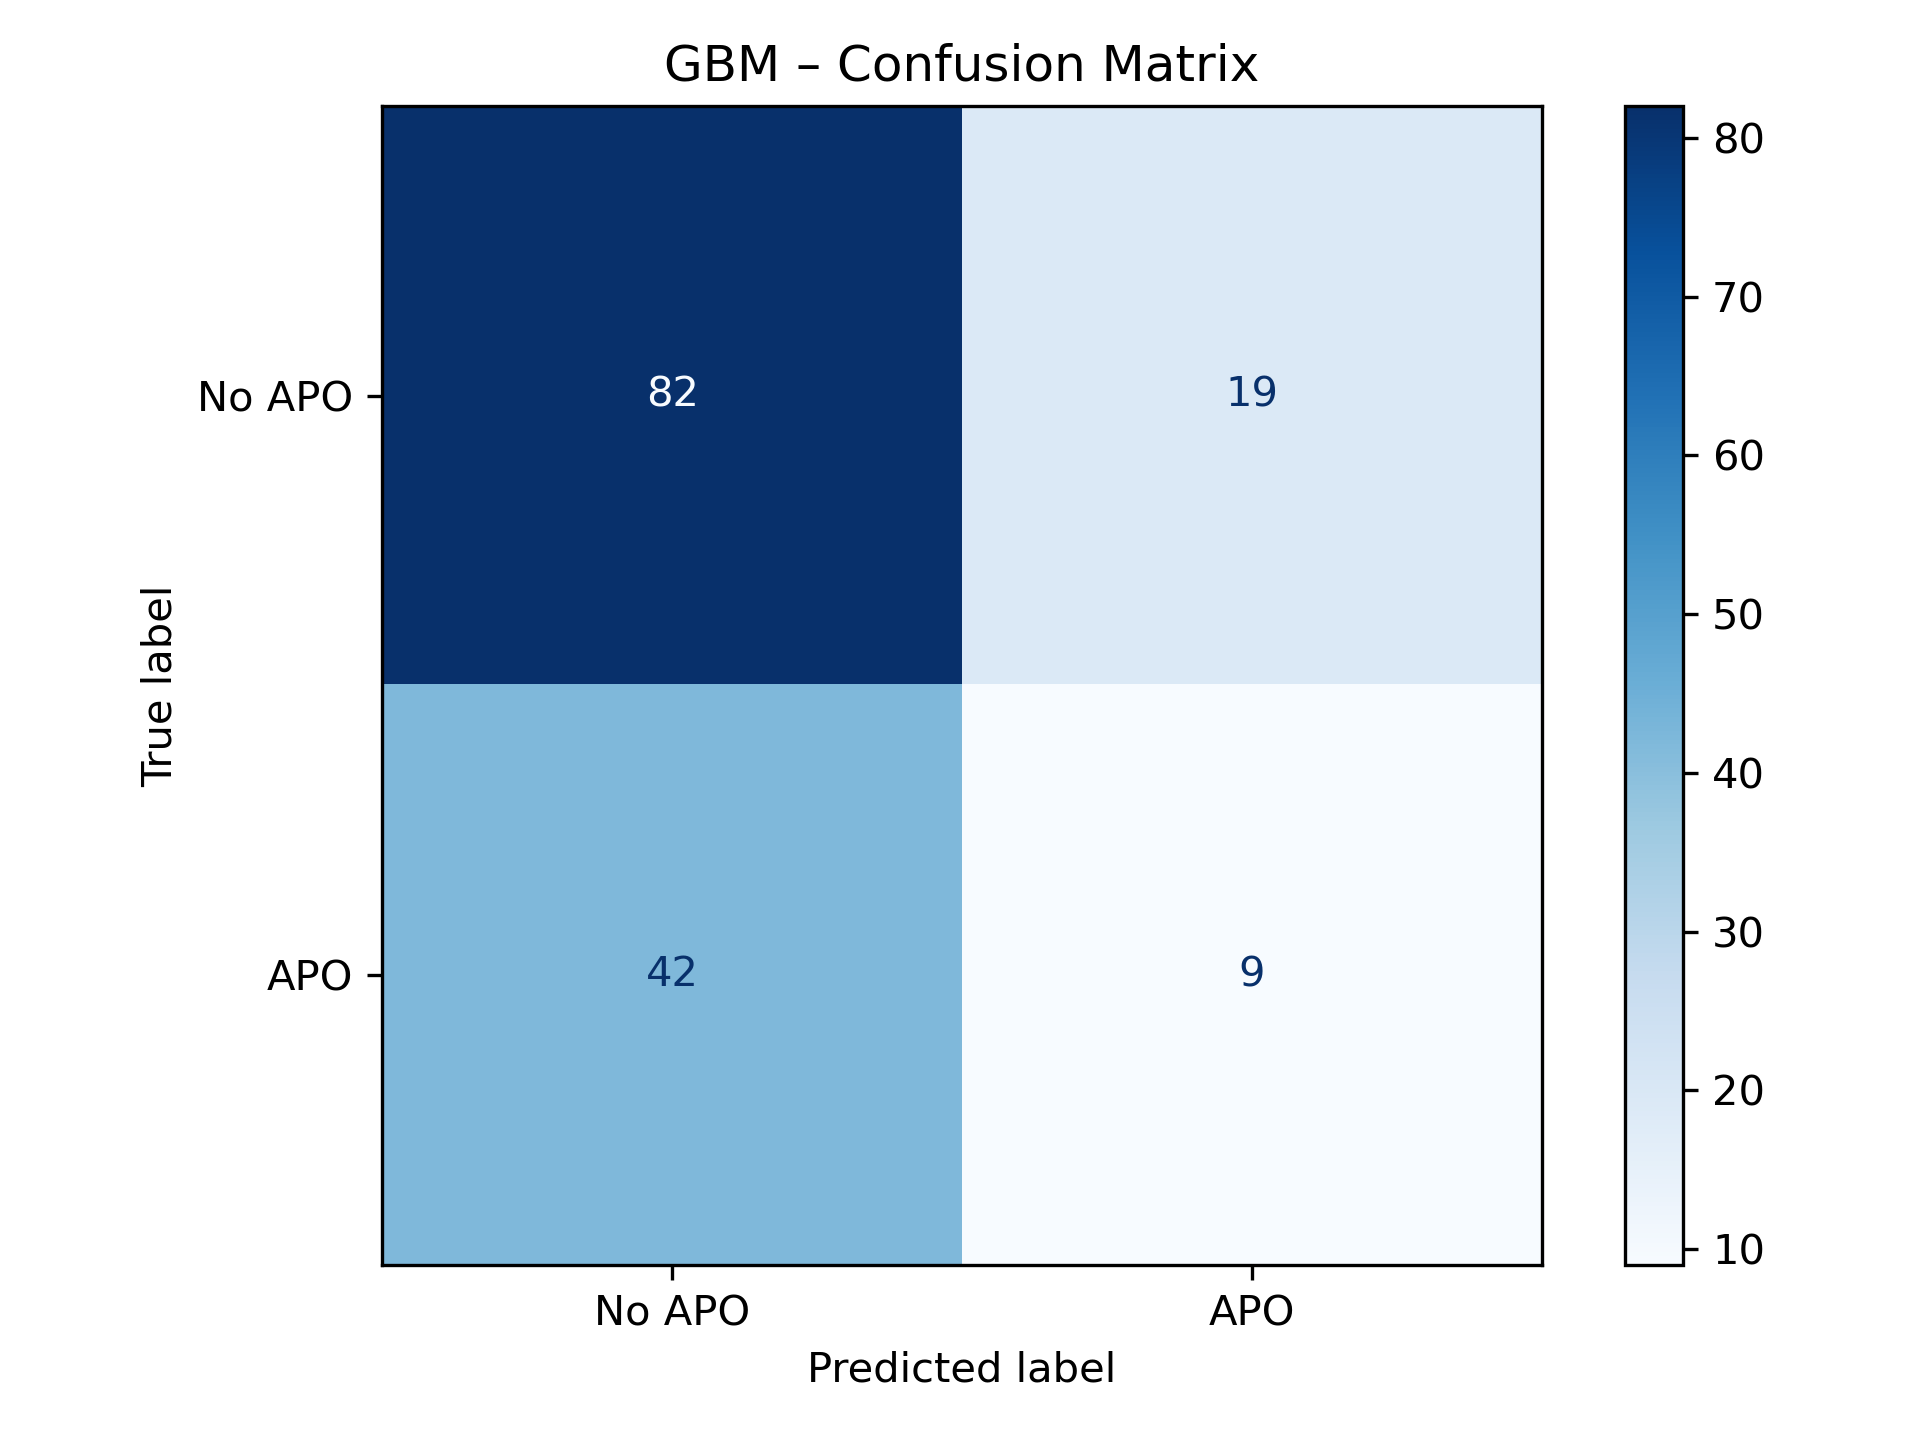

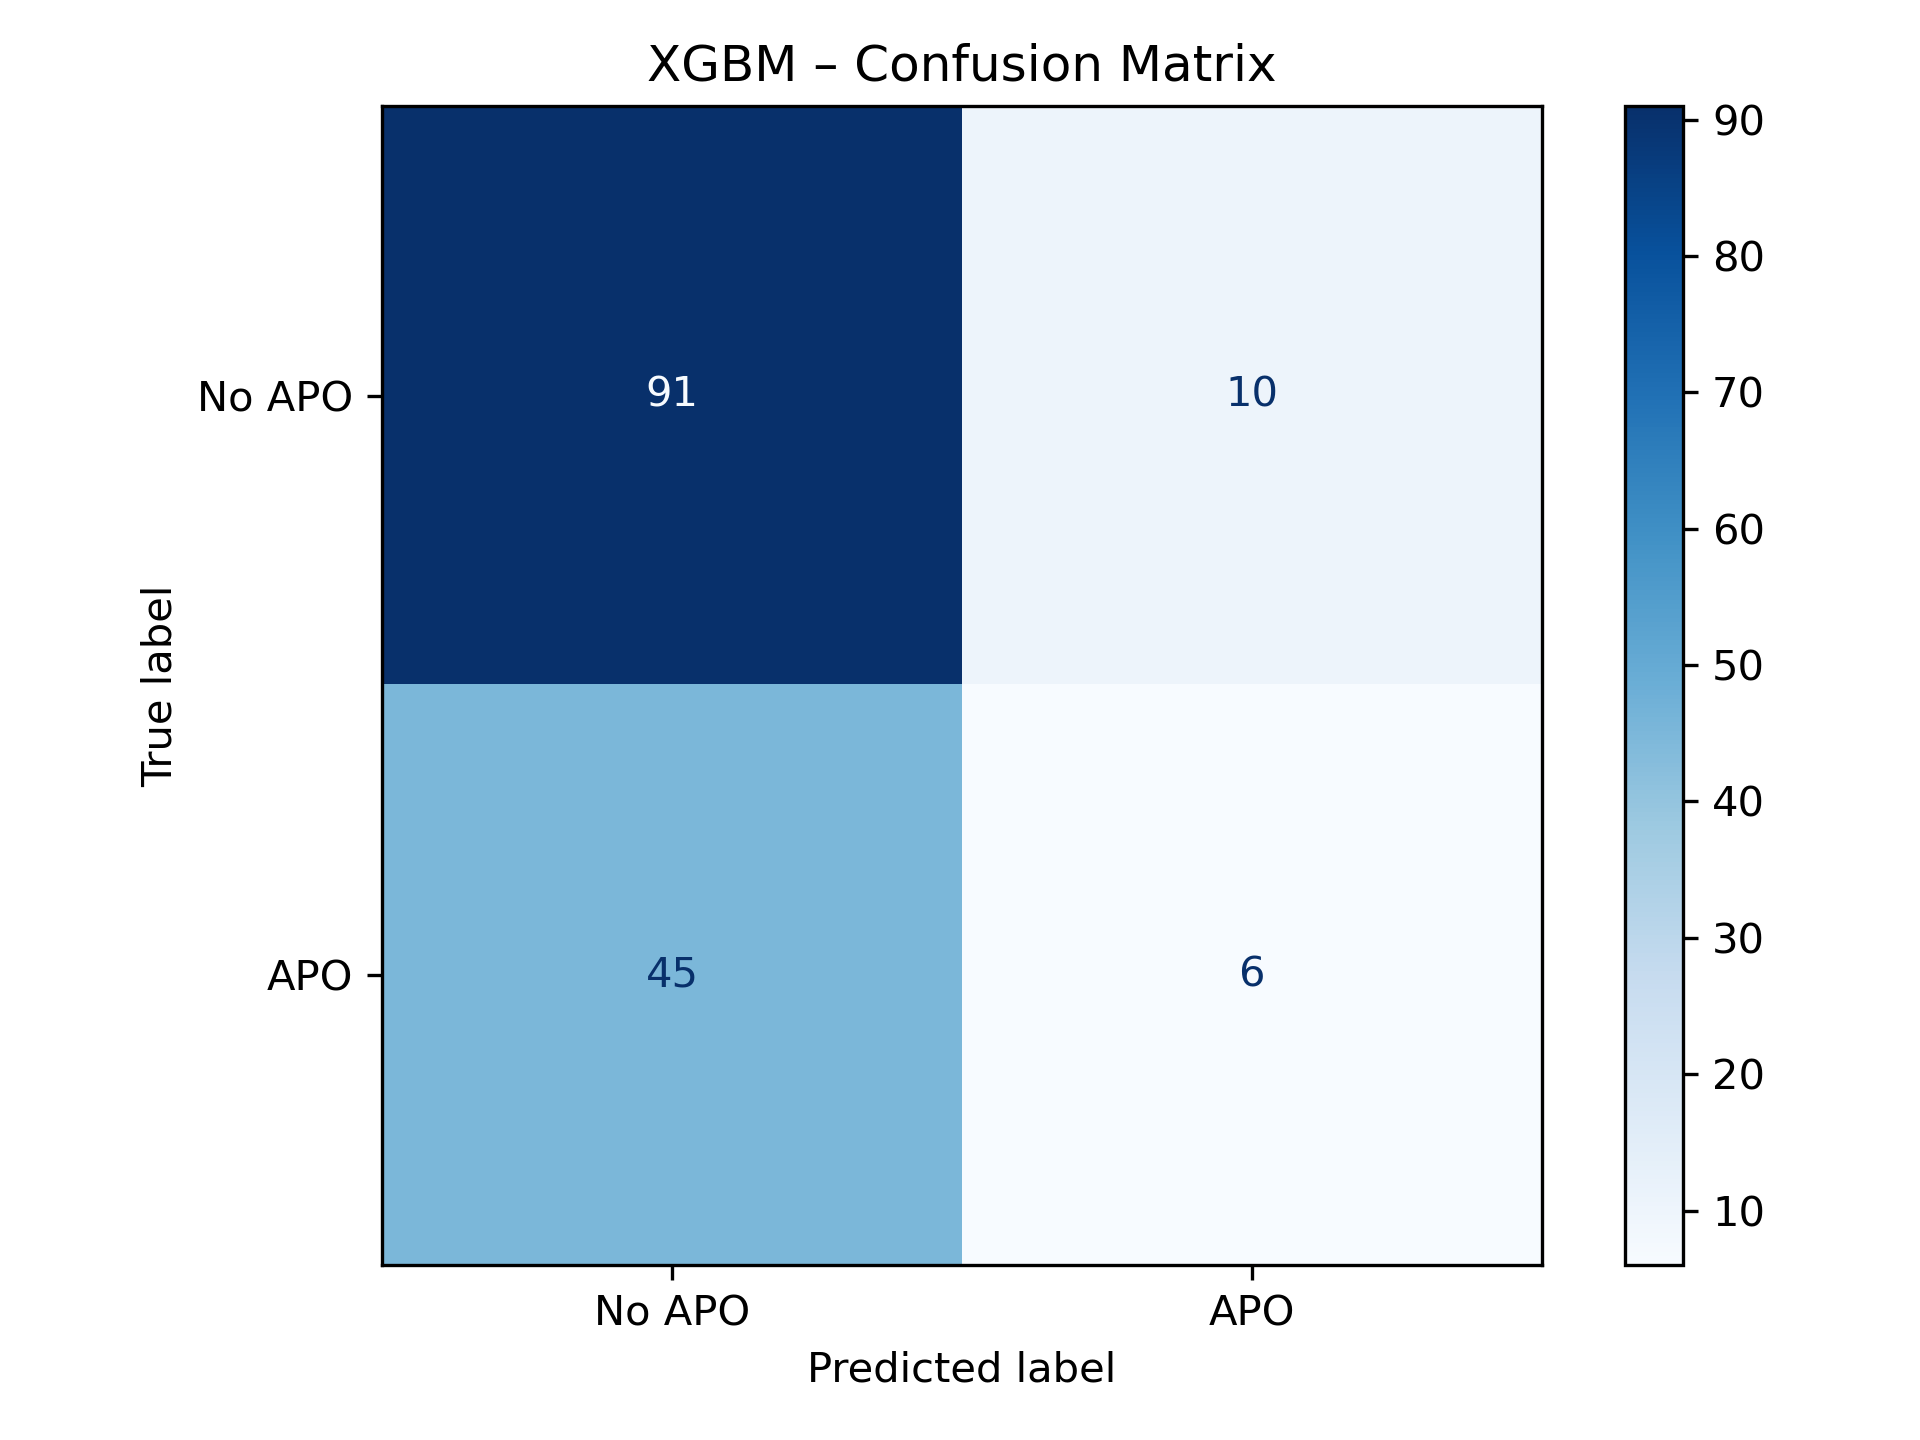

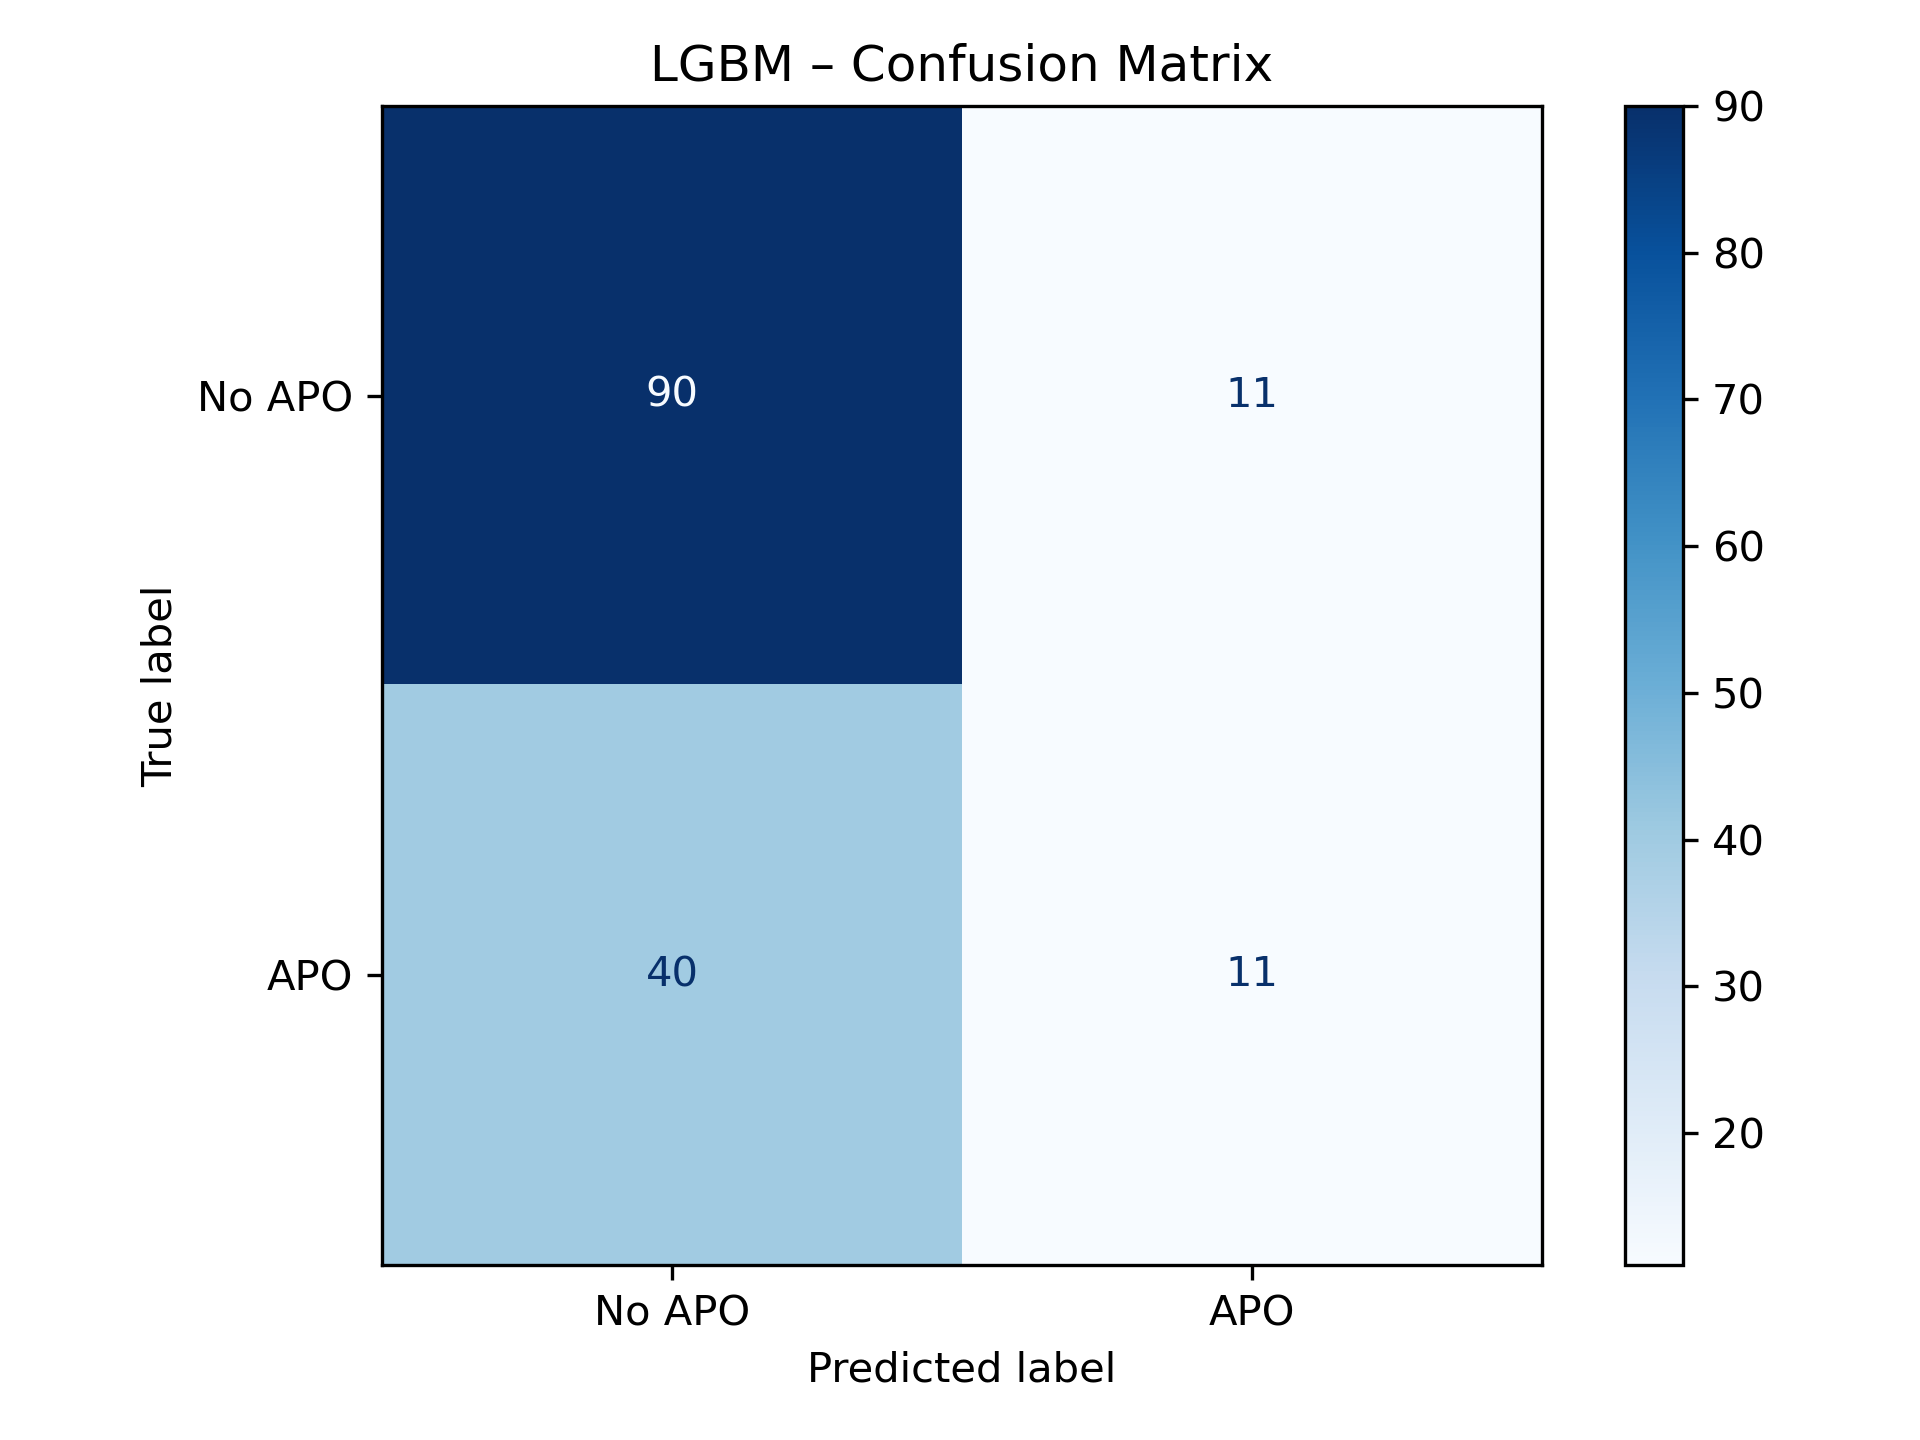


Imbalance Confusion Matrix


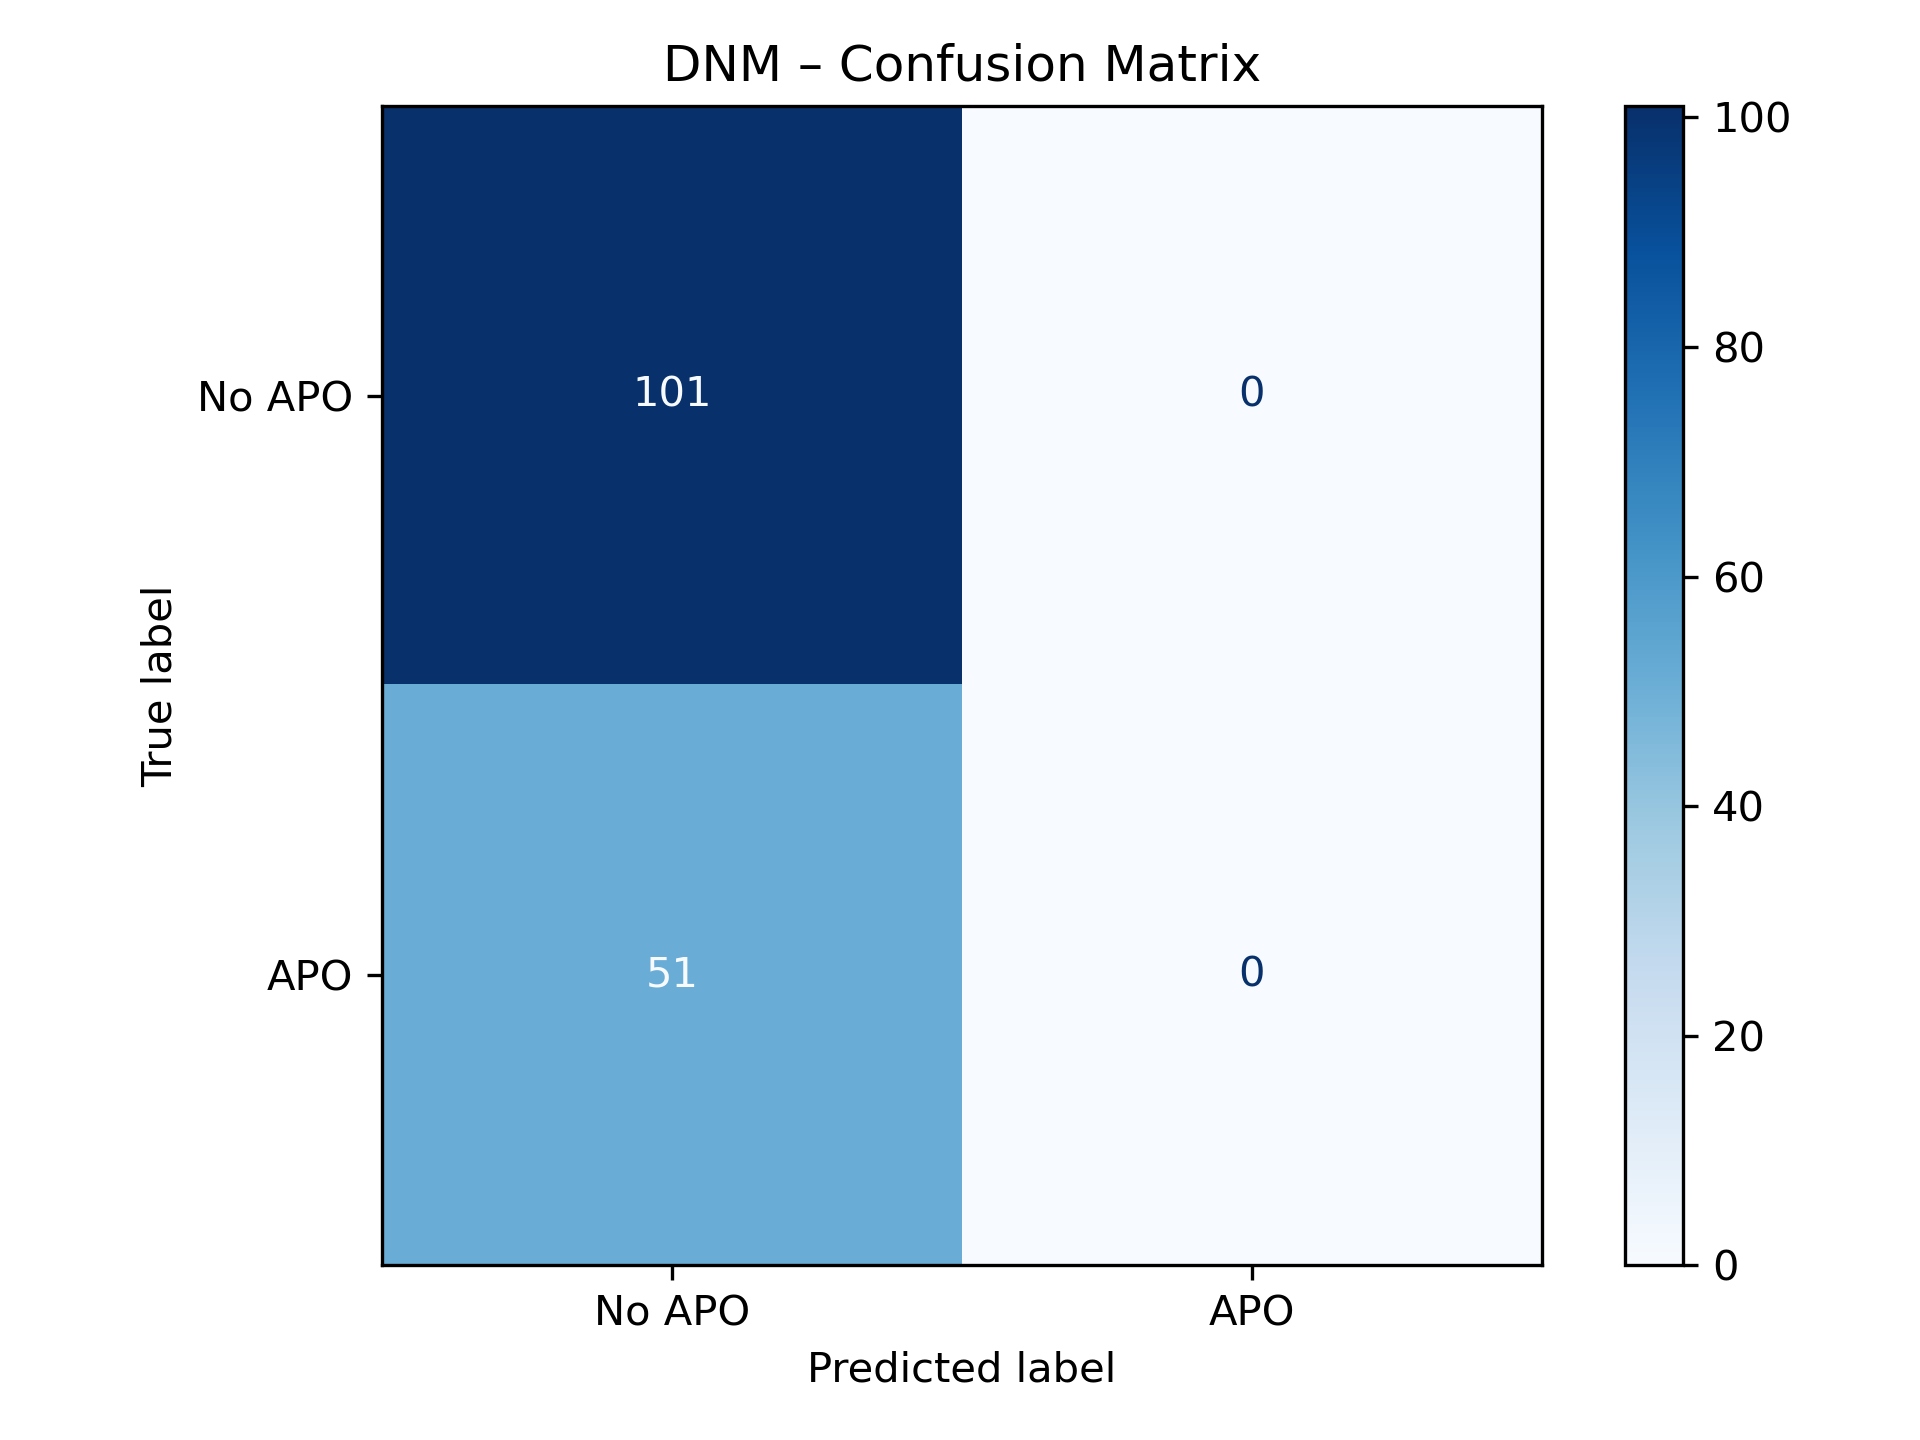

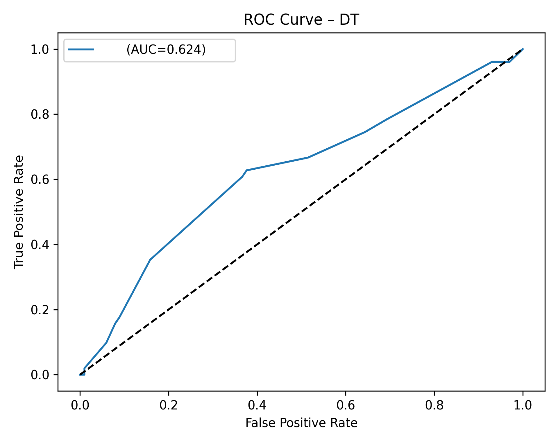

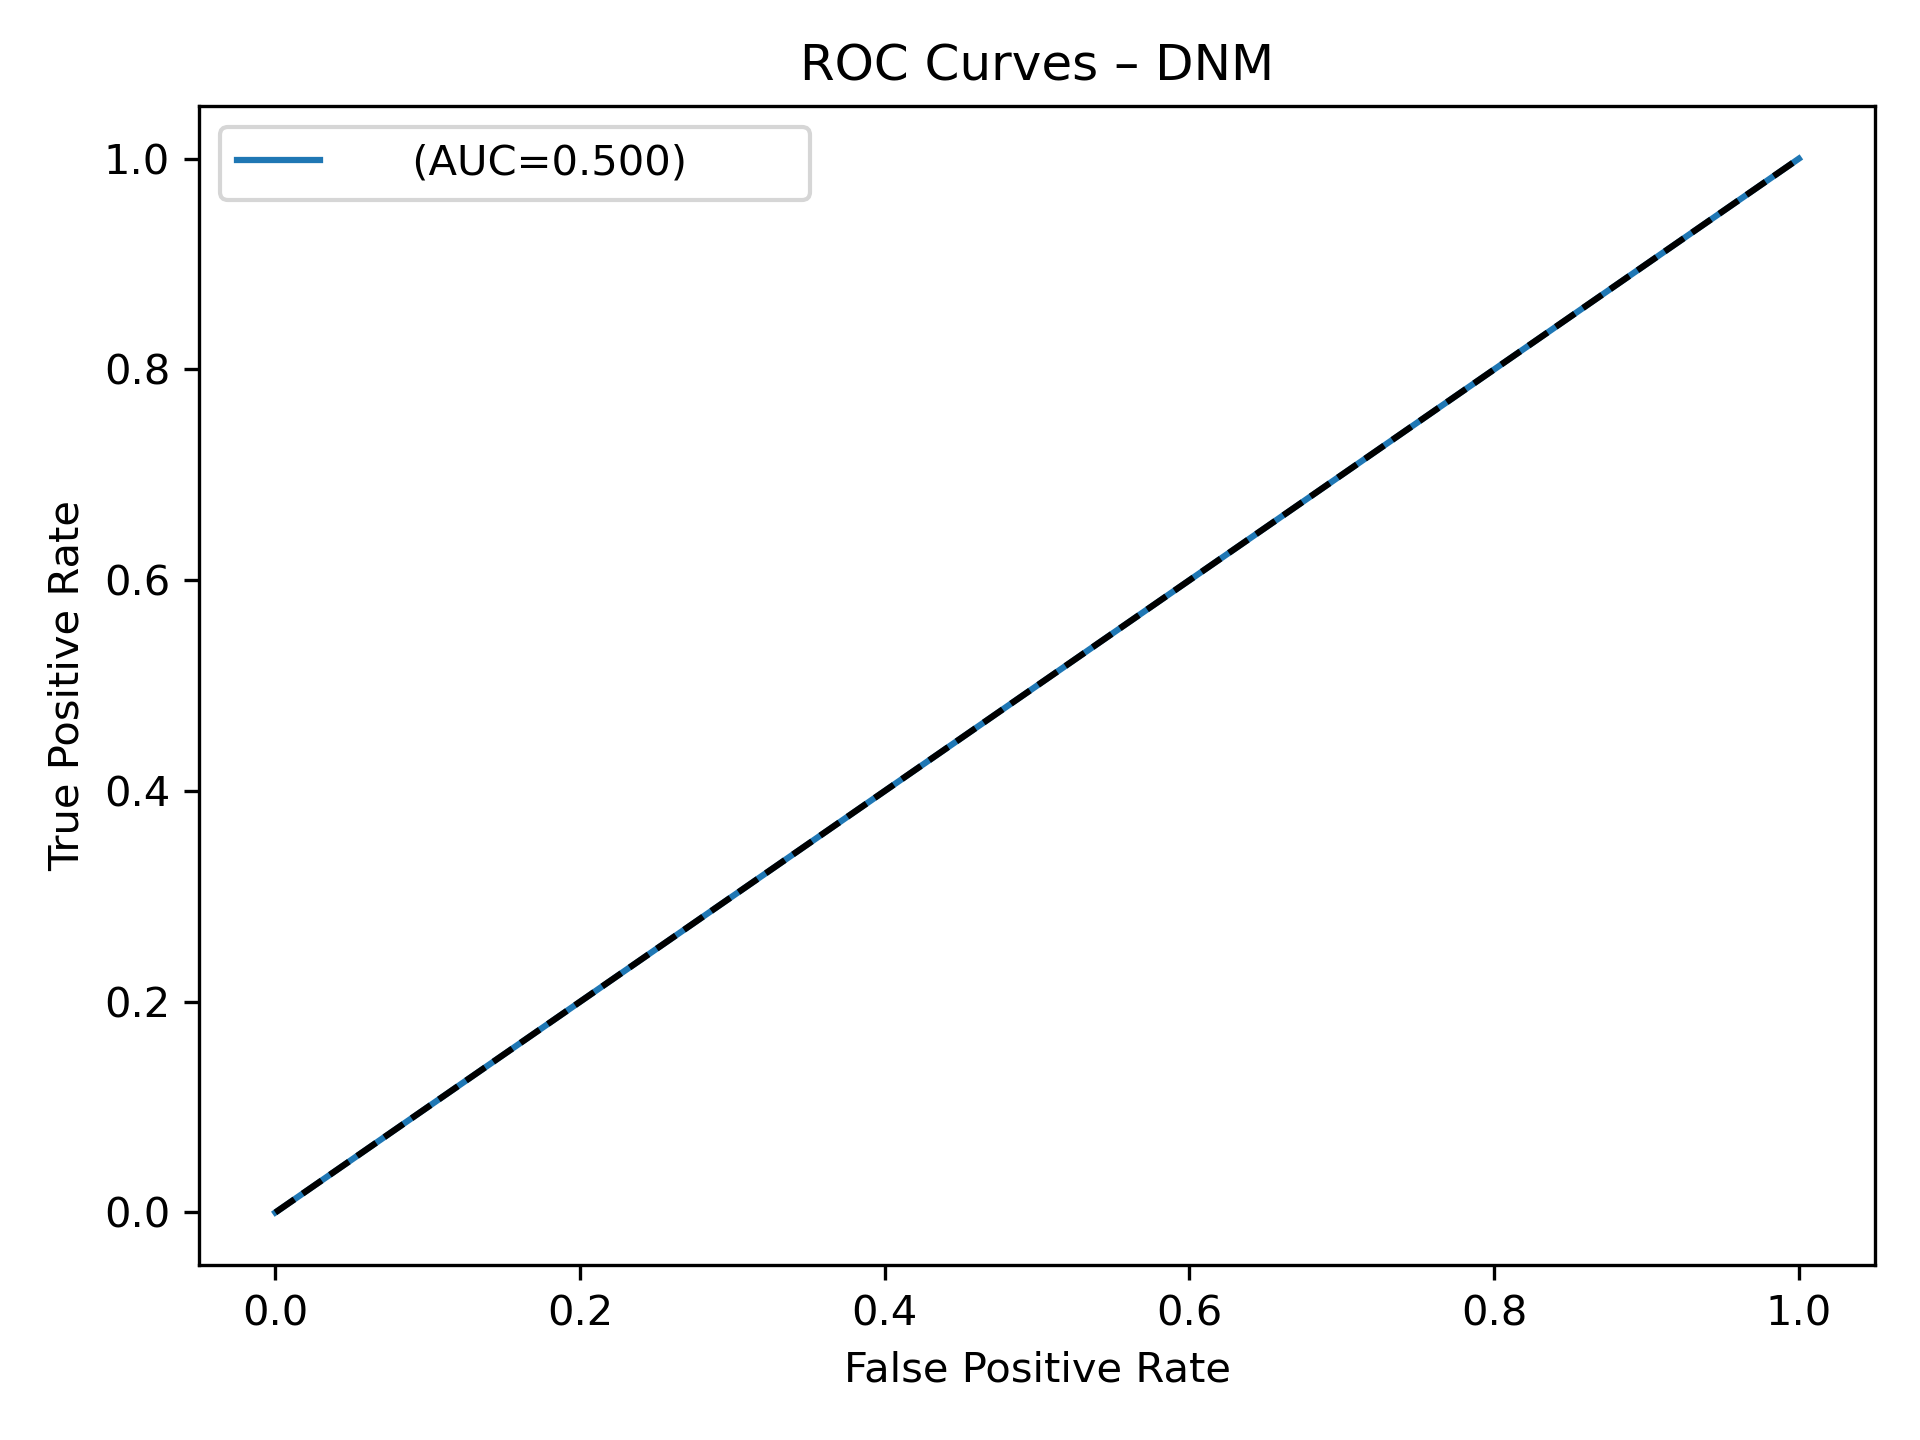

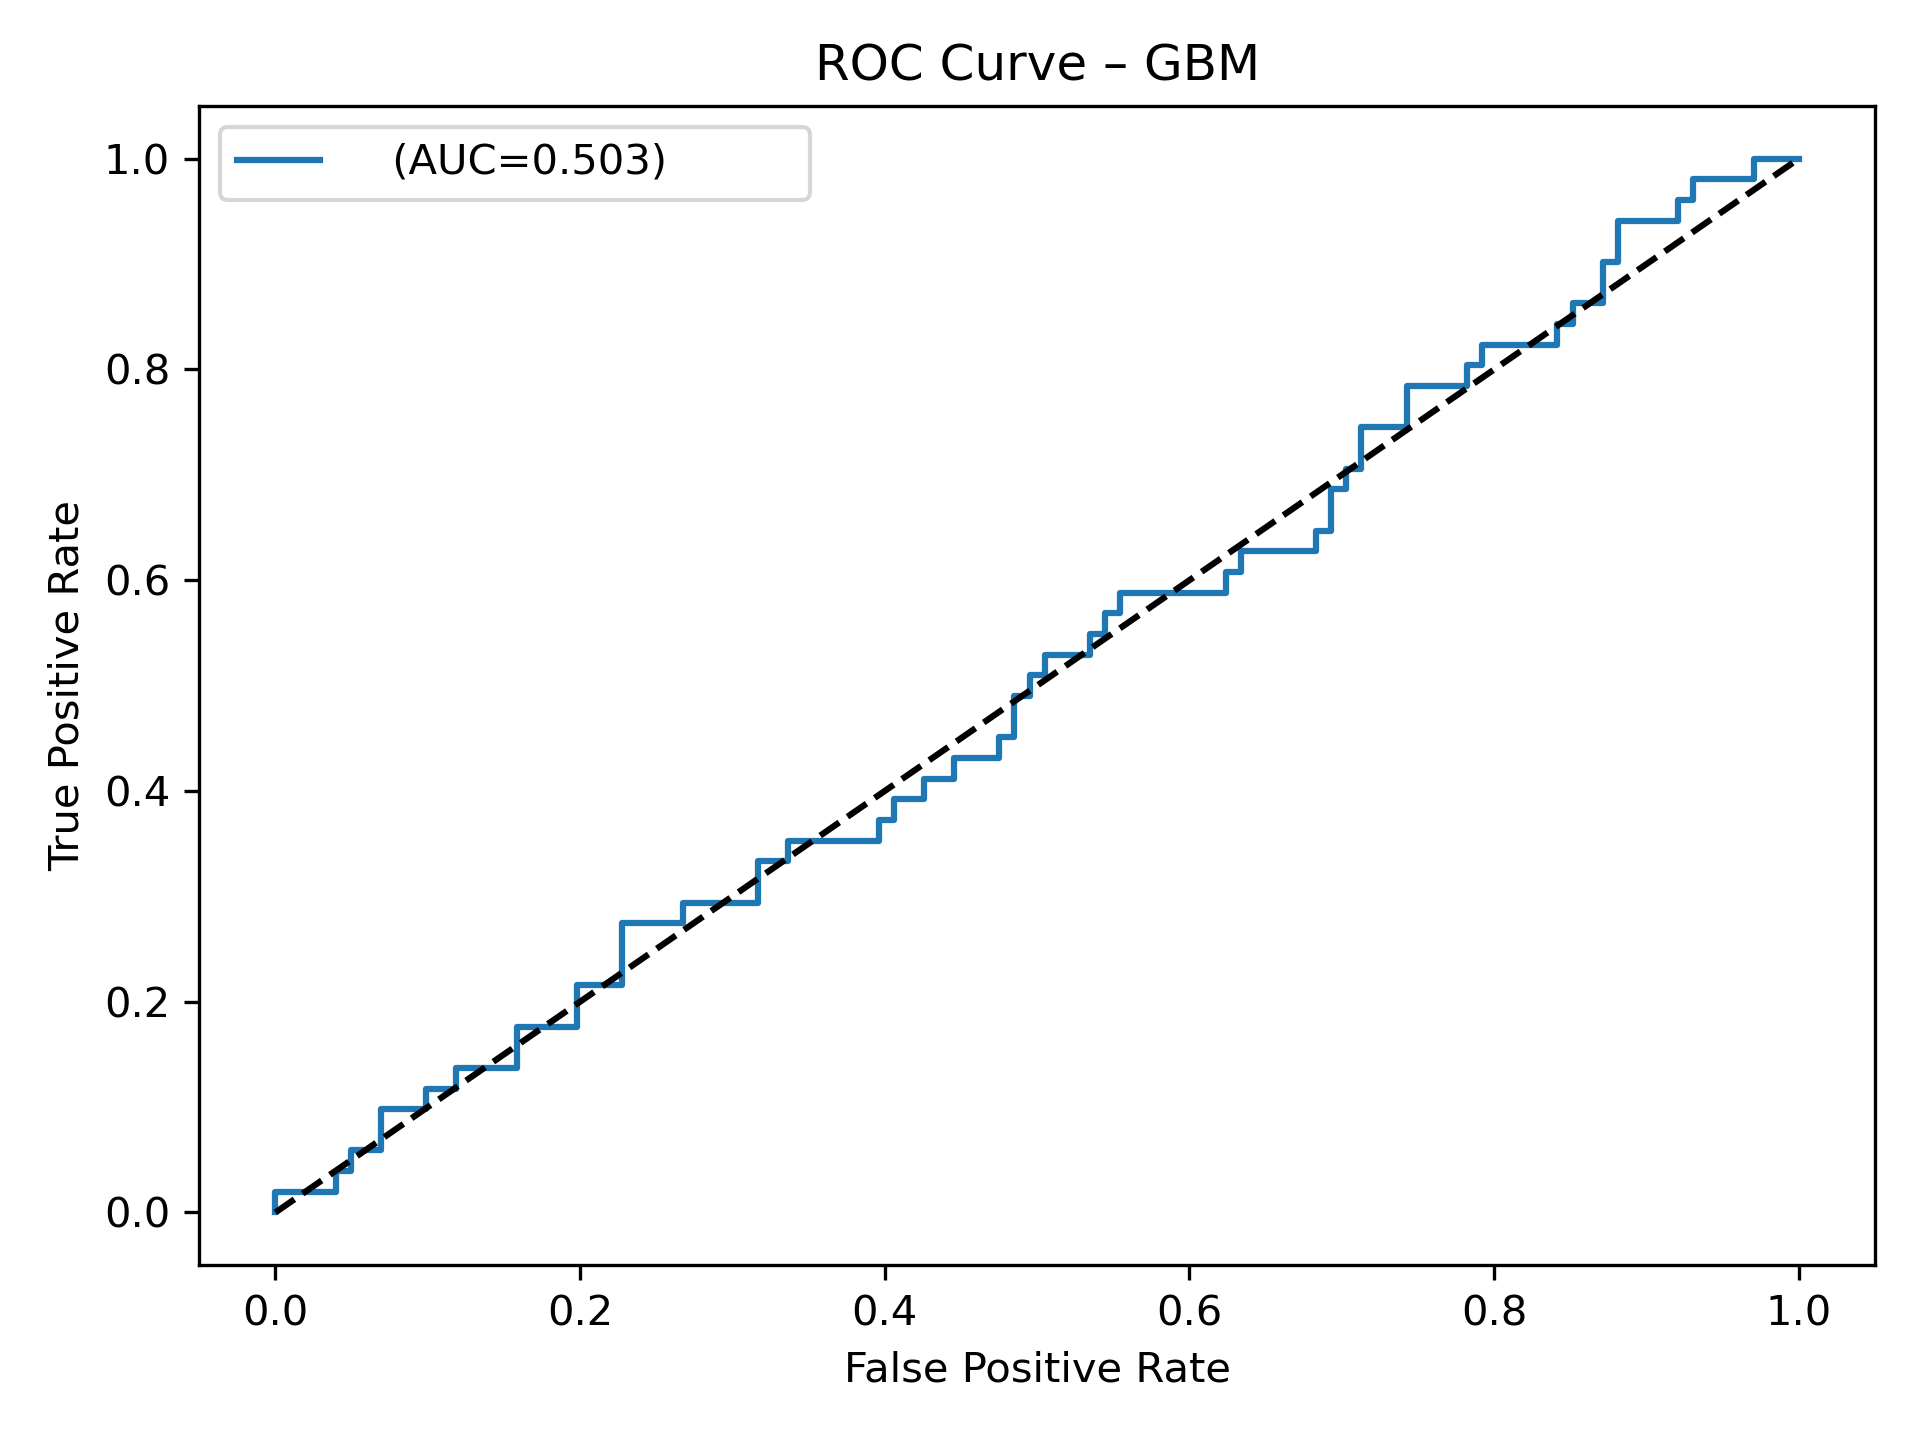

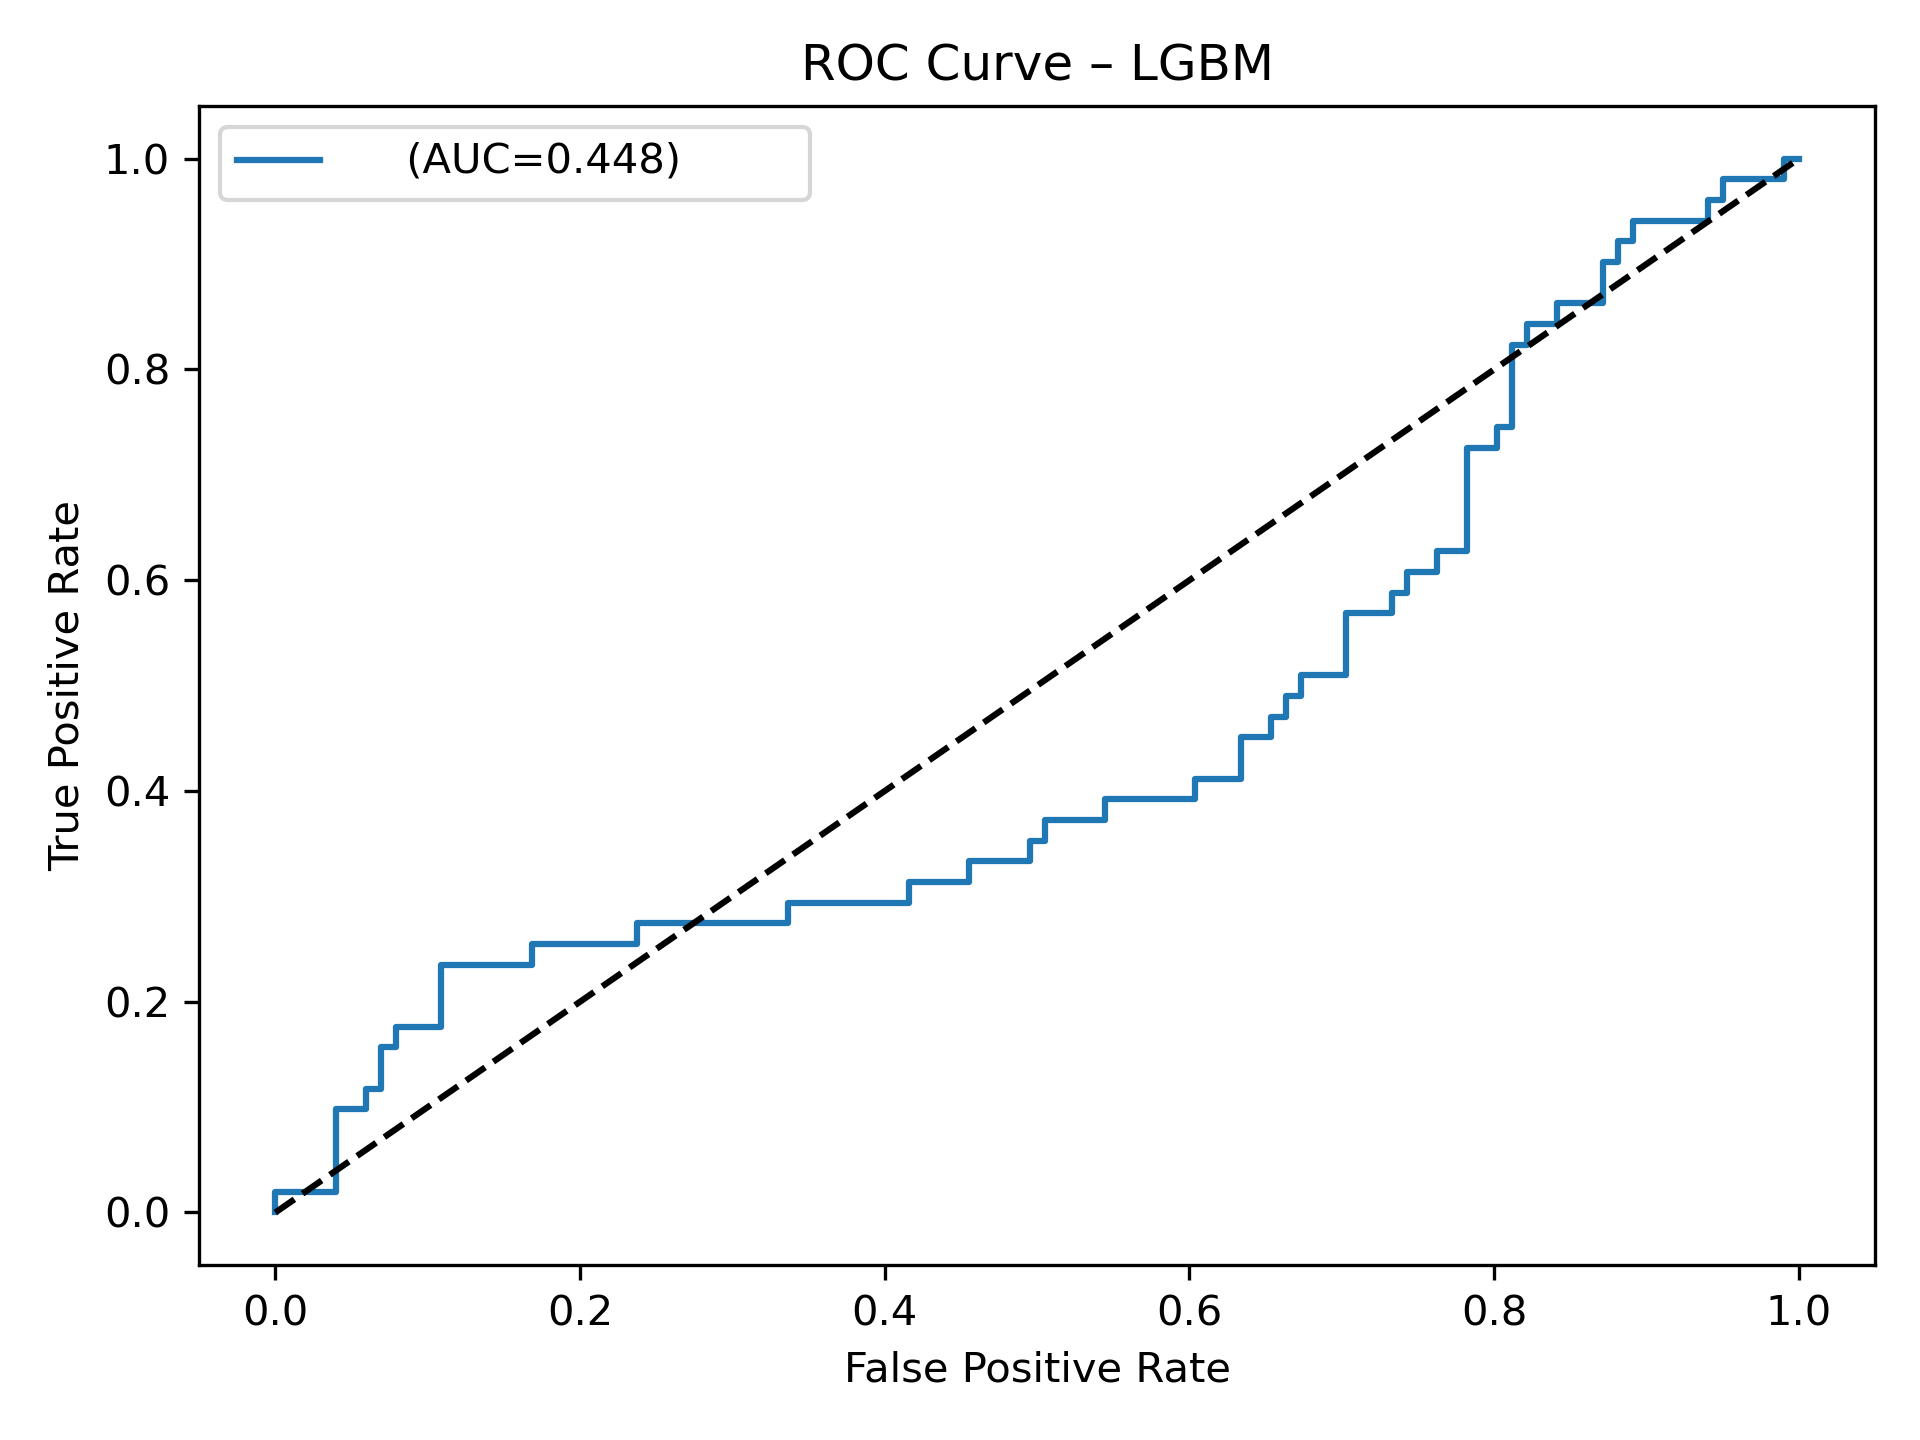

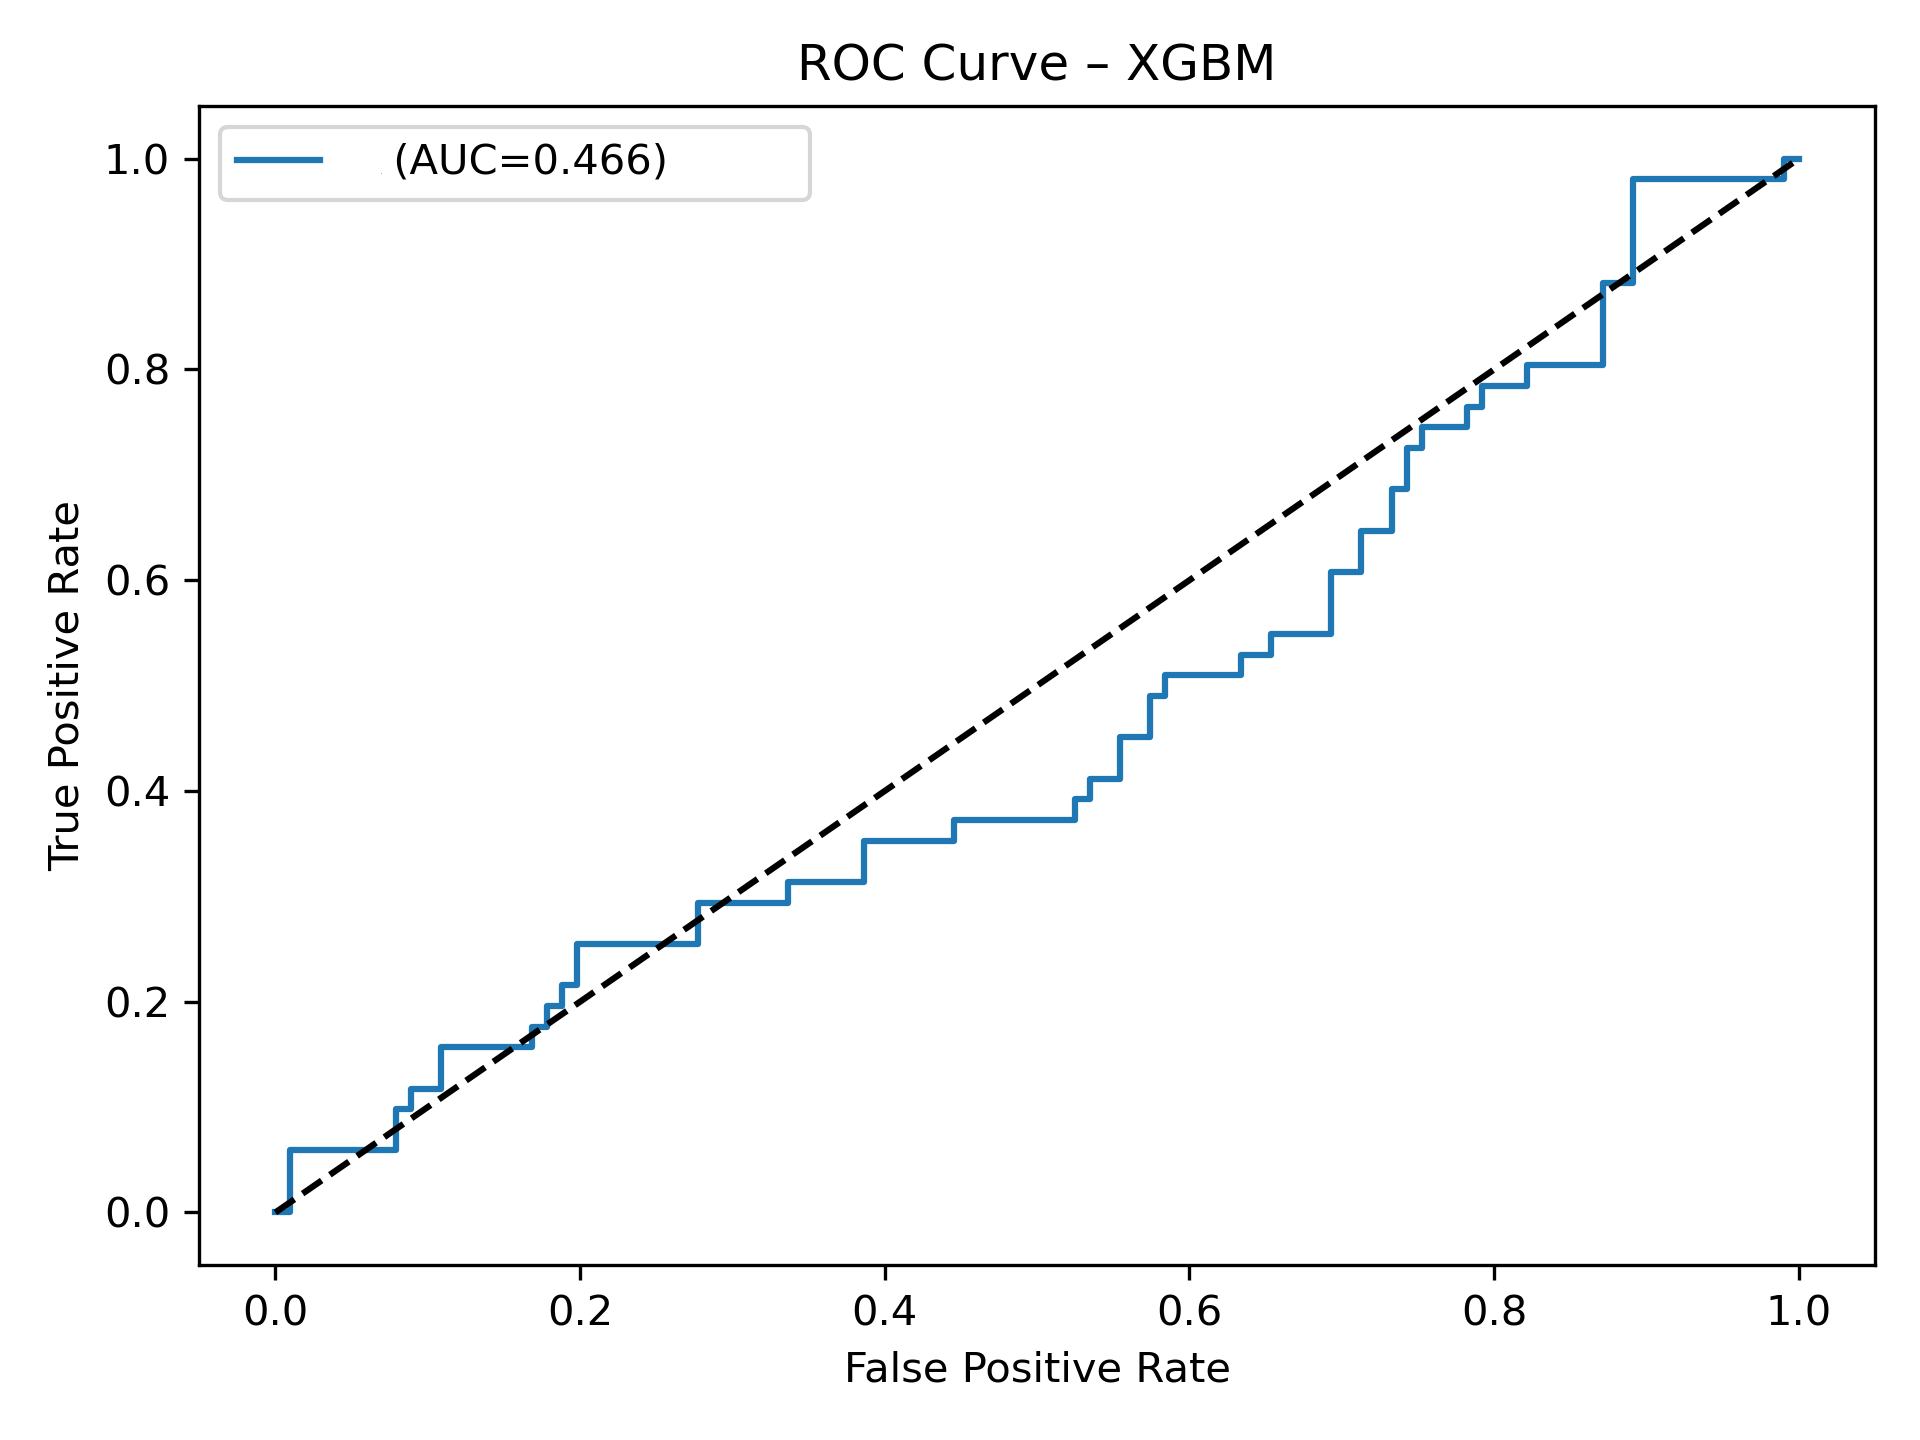

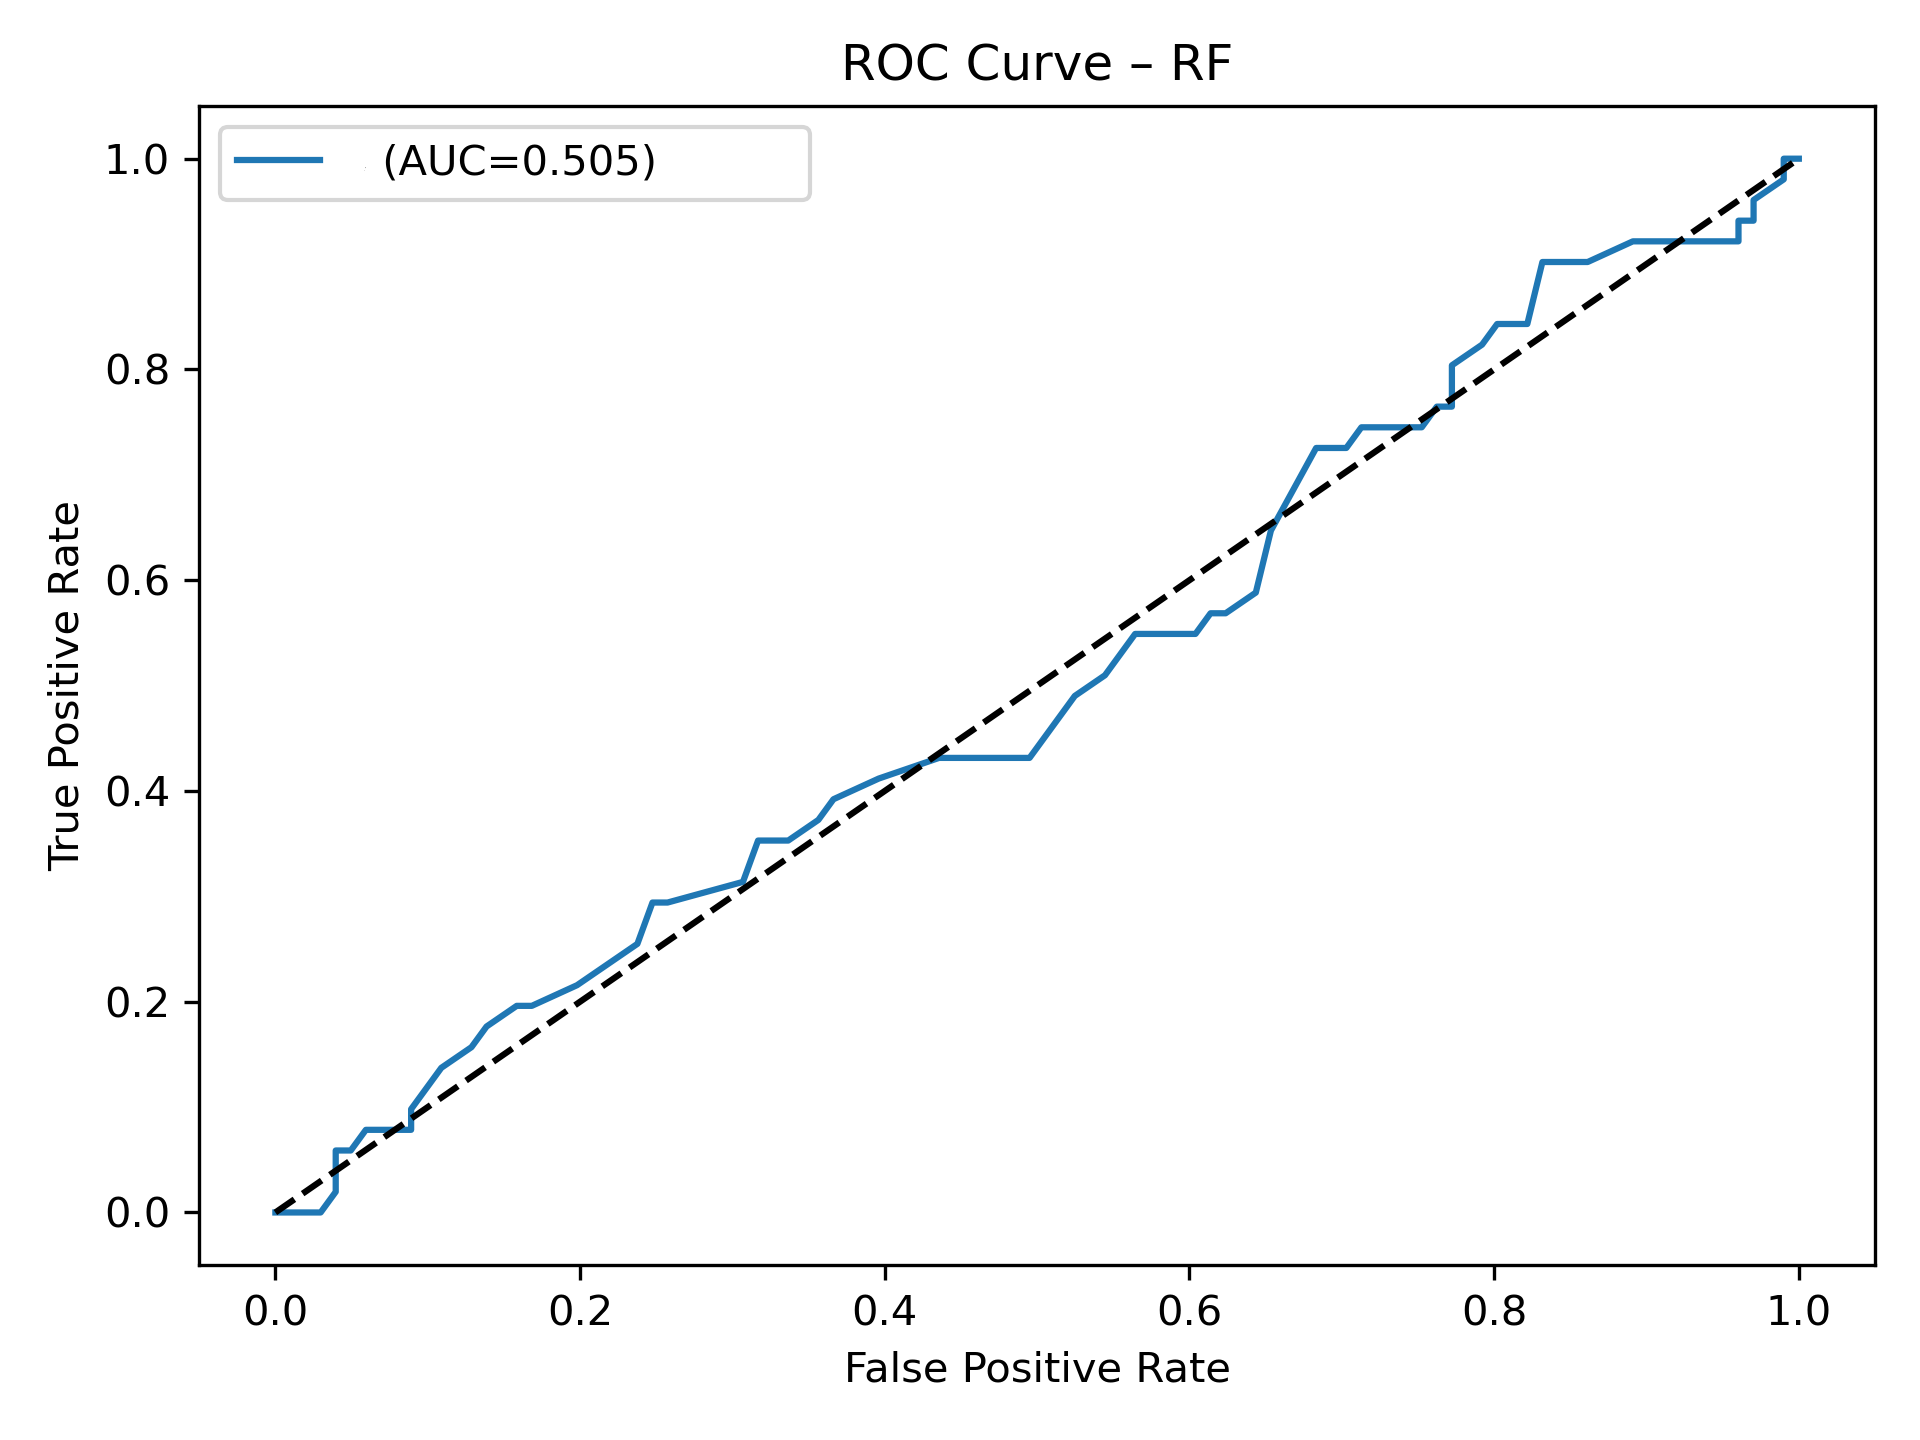


Imbalance Roc Curve


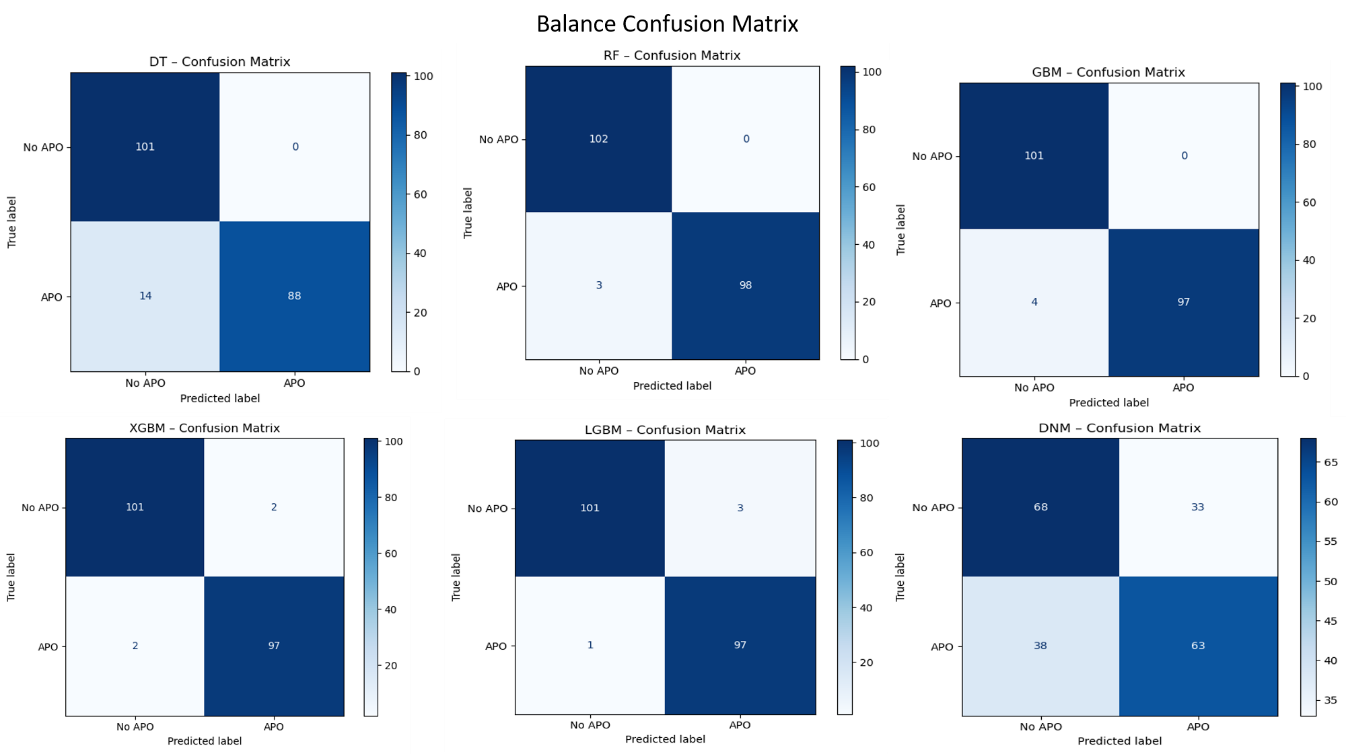


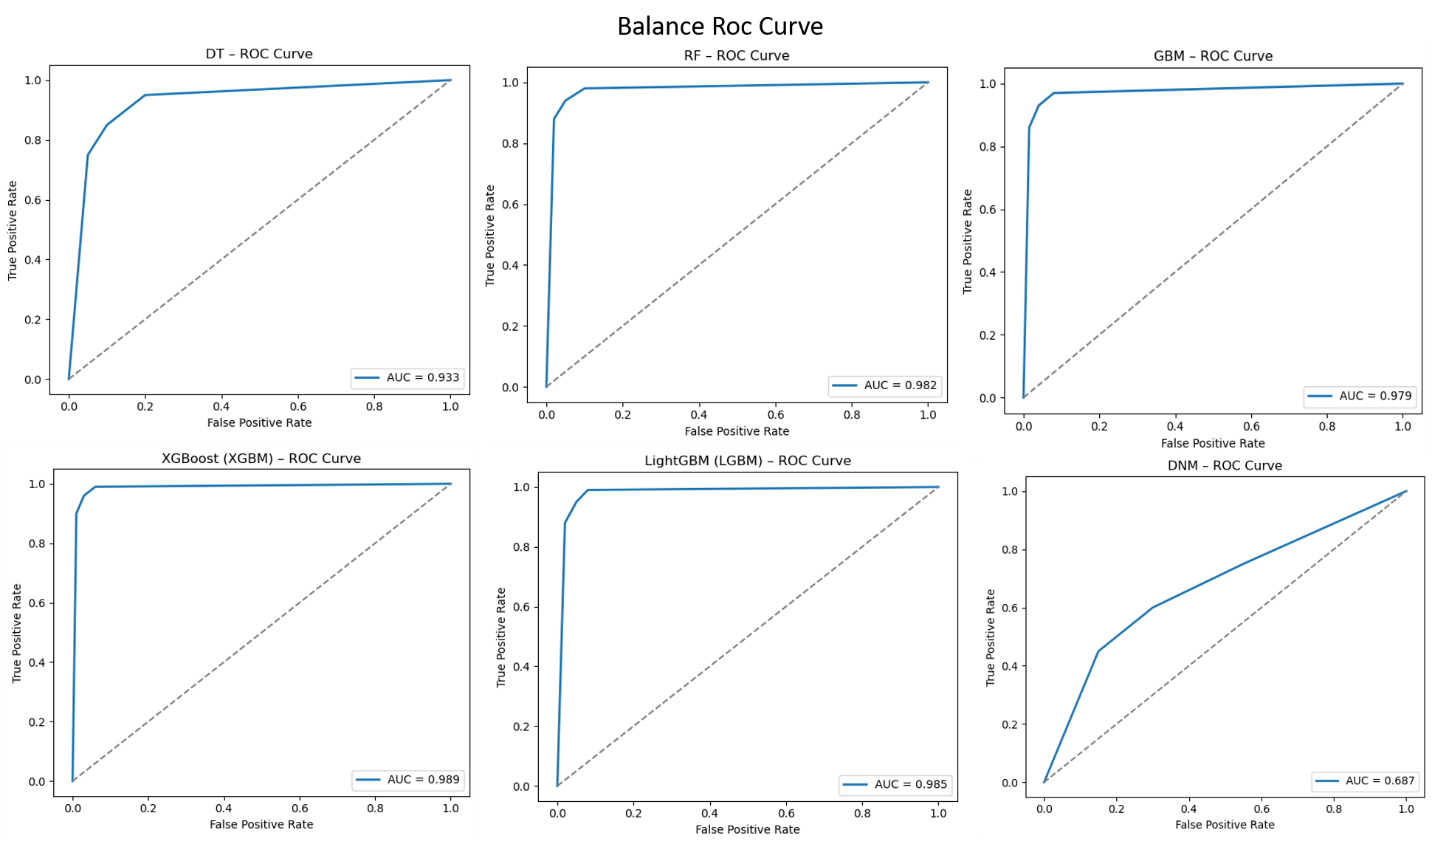

Supplement: Supplementary file 1 [file 1f5b7a4aab51c3f103e3cd18.docx]
